# Supplementary material
Source: PubMed Central journal article supplement (PMC8116343)

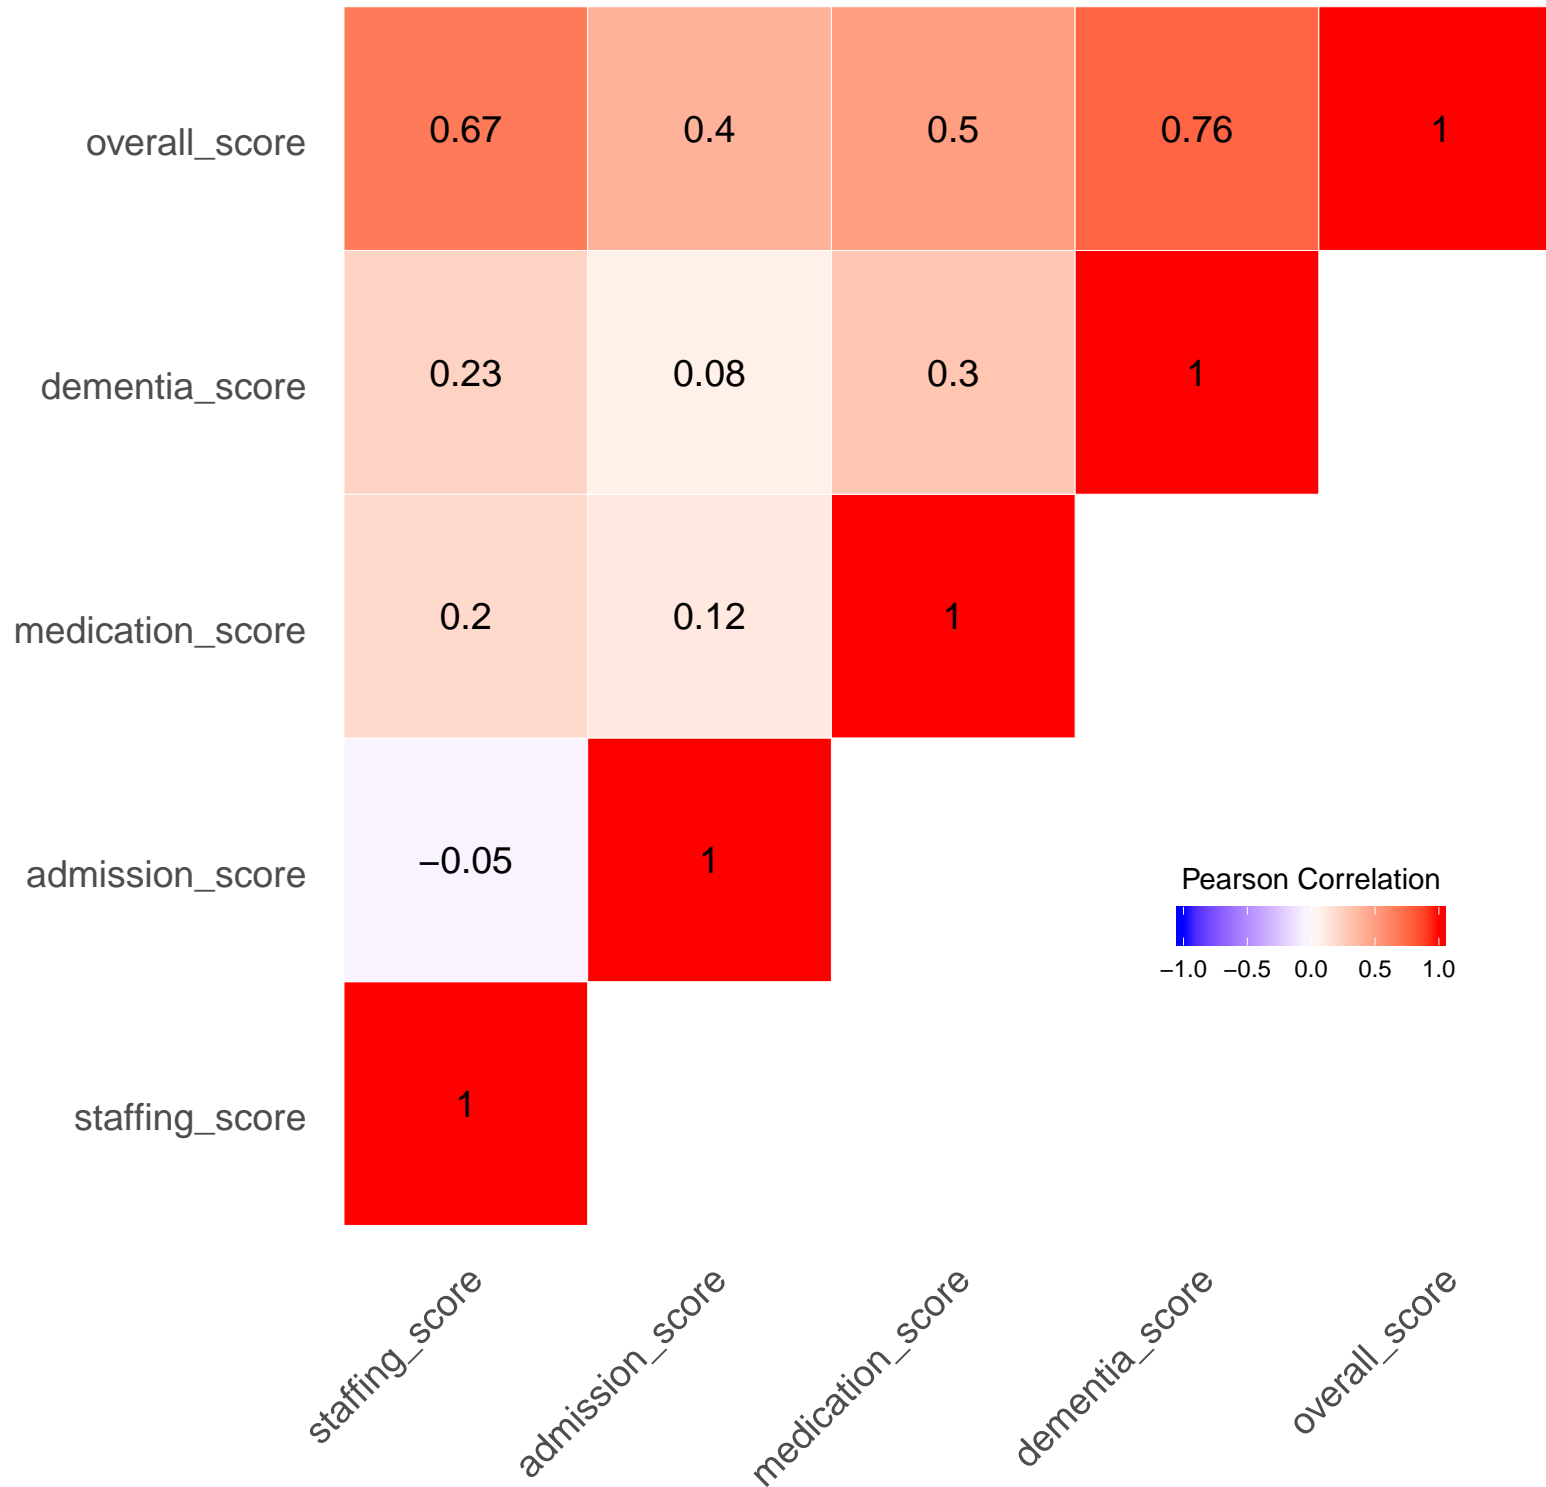

Supplement: NIHMS1665613-supplement-Figure_A_Pearson_Correlation.pdf [file NIHMS1665613-supplement-Figure_A_Pearson_Correlation.pdf]
